# Supplementary material for: Understanding the cooperative atomic motion and shape change of ultrasmall Au nanoparticles below the premelting temperature
Source: Royal Society of Chemistry journal article supplement (doi:10.1039/c7ra11604g), 2017-01-01
Supplement: c7ra11604g1.pdf [file c7ra11604g1.pdf]

## Electronic Supplementary information

# Understanding the cooperative atomic motion and shape change of ultrasmall Au nanoparticles below the premelting temperature

*Ying Yang*<sup>a\*</sup>, *Ning Yan*<sup>b\*</sup>

<sup>a</sup> Department of Mechanics and Engineering Structure, Wuhan University of Technology, 430070 Wuhan, China.

<sup>b</sup> Van't Hoff Institute for Molecular Sciences, University of Amsterdam, Science Park 904, 1098 XH Amsterdam, The Netherlands.

## Methodology

Radius of gyration  $R_g$  is described as

$$R_g^2 = \frac{1}{N} \sum_i (r_i - r_{mass})^2$$

where  $r_{mass}$  is the mass center for any given moment. It can be used to characterize the total shape change for the object. This quantity can be generalized by defining moments about different coordinate directions to define the  $R_g$  tensor.

The shape factors,  $R_g$ ,  $\lambda_1$ ,  $\lambda_2$ ,  $\lambda_3$ ,  $b$ ,  $c$ , and  $k^2$  are defined below:

$$R_g^2 = \lambda_1^2 + \lambda_2^2 + \lambda_3^2$$

$$b = \lambda_1^2 - \frac{1}{2}(\lambda_2^2 + \lambda_3^2)$$

$$c = \lambda_2^2 - \lambda_3^2$$

$$k^2 = \frac{b^2 + (3/4)c^2}{R_g^4}$$

Dynamic atomic position  $r$  is used to show the relative position of the specific atom as a function of time, and can be rescaled by the initial spherical radius,  $r_0$ . For N55 Au NP, the initial radius is 0.53 nm. The relation is

$$\rho = \frac{1}{r_0} |r_i - r_{mass}|$$

where  $r_i$  is the position of specified atom  $i$ ,  $r_0$  is the initial radius, and  $r_{mass}$  is the center of mass of the NP. If  $\rho \rightarrow 0$ , the  $i^{\text{th}}$  atom occupies the central position within the NP, while  $\rho = 1$  indicates that this particle has emerged at the NP surface. See Scheme S1 for details.

The dynamic heterogeneity of the nanoparticle (NP) was quantified using the non-Gaussian parameter  $\alpha_2$ . The peak position represented a characteristic time  $t^*$  meaning the cage effect gets the maximum. The expression for  $\alpha_2$  is

$$\alpha_2(\Delta t) = \frac{3\langle r^4(\Delta t) \rangle}{5\langle r^2(\Delta t) \rangle^2} - 1$$

The Van Hove function  $G_s(r, t)$  gives the probability that a particle has moved a distance of  $r$  in a period of time  $t$ . The peaks at the successive nearest neighbour distances indicate a “hopping” motion, thus helping distinguish different kinds of atoms based on their movement. Substituting  $t^*$  derived in non-Gaussian parameter  $\alpha_2$  into  $G_s(r, t)$ , van Hove function becomes  $G_s(r, t^*)$ , which is essential for the definition of string-like cooperative motion. The mathematical formula for  $G_s(r, t^*)$  is written as

$$G_s(r, t^*) = \frac{1}{N} \sum_k \langle \delta(r - [r_k(t^*) - r_k(0)]) \rangle$$

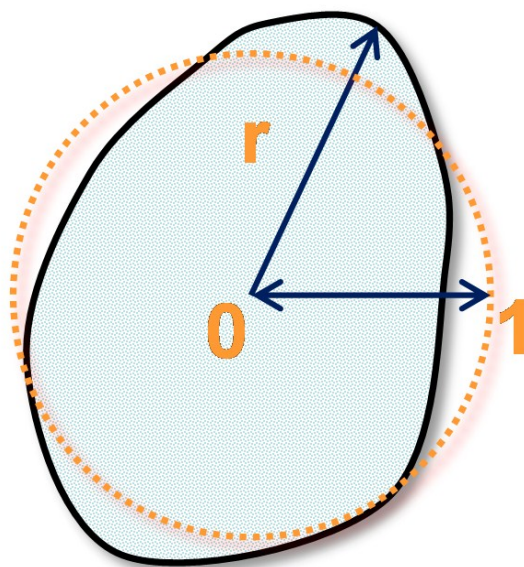

**Scheme S1.** Sketch of the dynamic atomic position  $\rho$  (distance of the arrow).

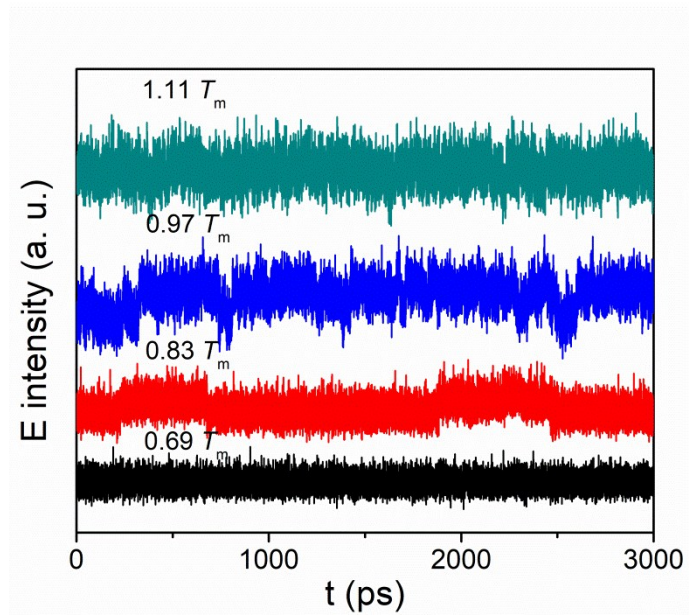

**Figure S1.** The variation of  $E$  as a function of time at different temperatures for N55 Au NP.

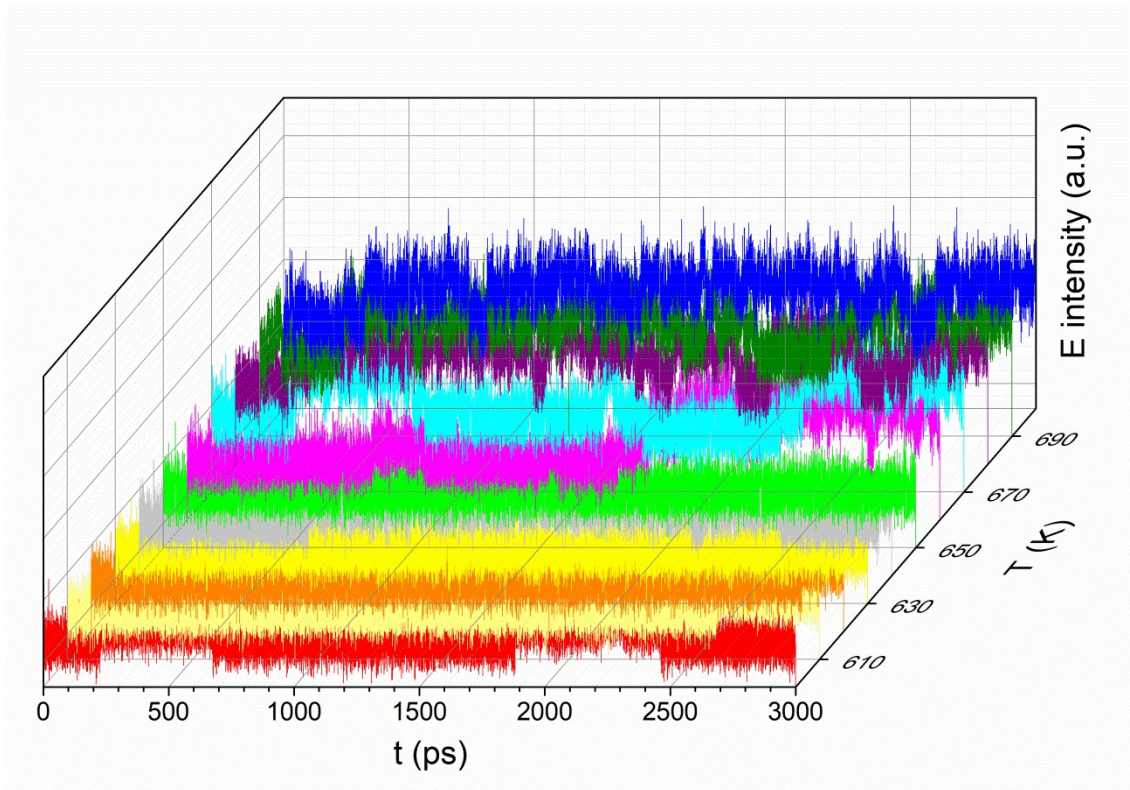

**Figure S2.** The variation of  $E$  as a function of time at different temperatures from  $0.83 T_m$  to  $0.97 T_m$  for N55 Au NP.

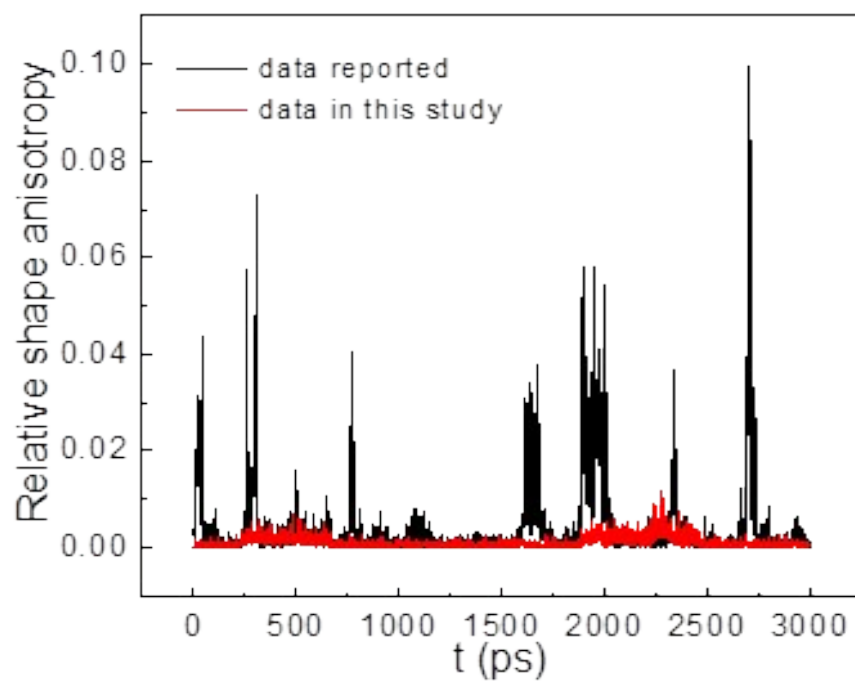

**Figure S3.** A comparison of the relative shape anisotropy of N55 Au NP at  $T < T_w$  and the previously reported N55 Ni NP at  $T > T_w$  in ref. 25.

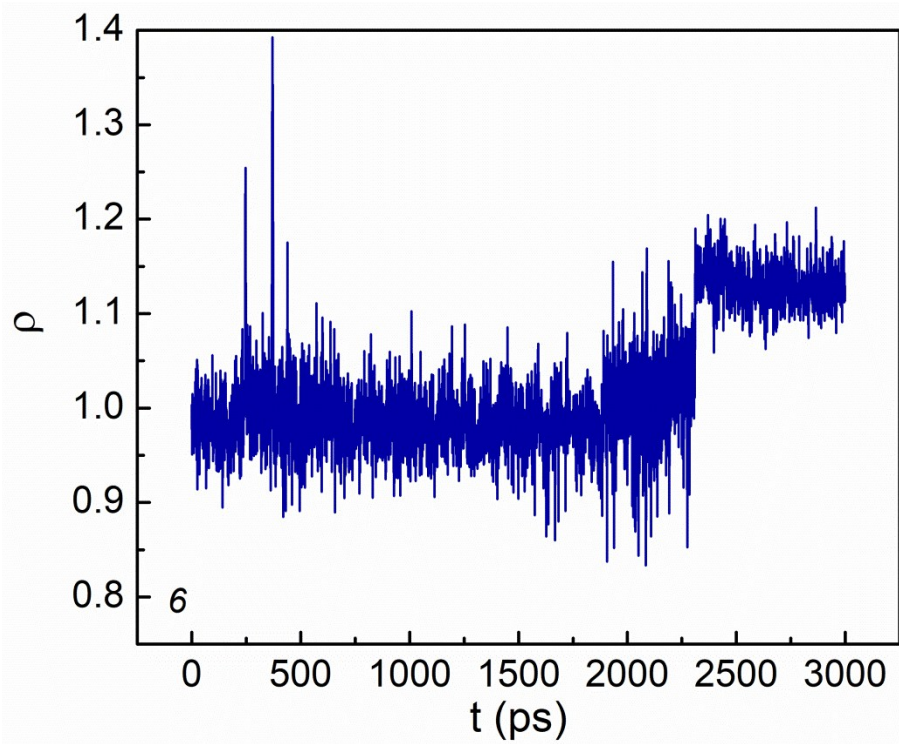

**Figure S4.** The variation of  $\rho$  as a function of time for atom 6, indicating the outward movement of this outer atom.



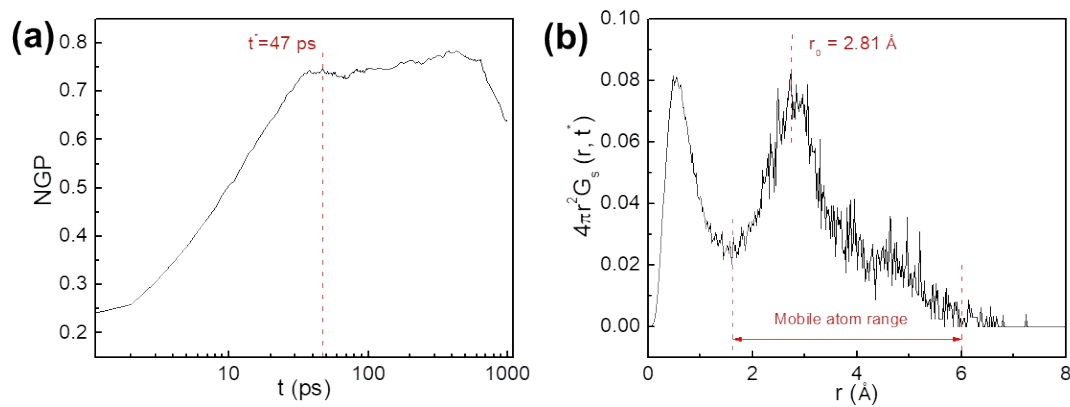

**Figure 5.** The plot of (a) Non-Gaussian parameter  $\alpha_2$  and (b) van Hove function  $G_s(r, t^*)$  at  $0.83T_m$  for N55 Au NP.

$\alpha_2$  reached the peak position at  $t^* = 47$  ps, indicating the cage effect came to the maximum. Substituting  $t^*$  into  $G_s(r, t)$  yielded the typical “hopping” peak at  $2.81$  Å, evidencing the heterogeneity of the dynamic motions of atoms. The “mobile” atom cut-off range is shown by the dashed line, from  $0.58r_0$  to  $2.14r_0$ .

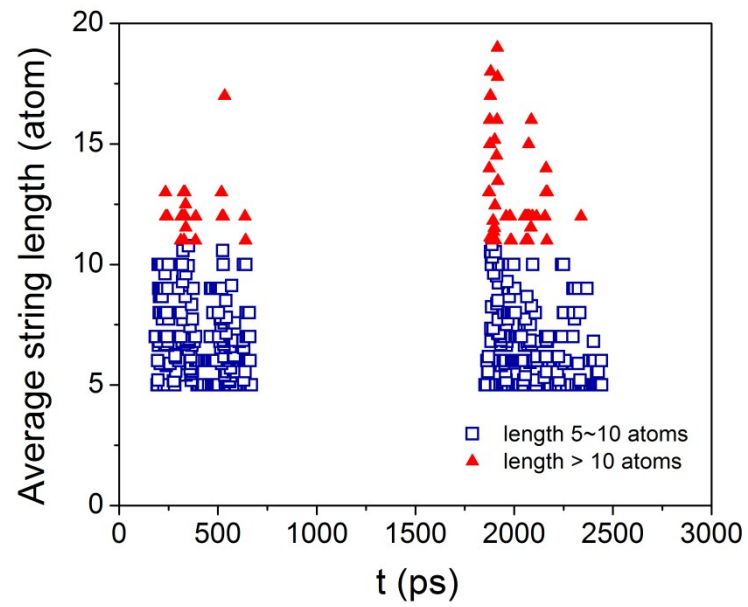

**Figure 6.** The plot of strings with the length  $>5$  atoms for N55 Au NP at  $0.83T_m$ .
